# Supplementary material for: Multilevel/hierarchical nanocomposite-imprinted regenerated cellulose membranes for high-efficiency separation: a selective recognition method with Au/PDA-loaded surface
Source: Royal Society of Chemistry journal article supplement (doi:10.1039/d1en00238d), 2021-01-01
Supplement: d1en00238d1.pdf [file d1en00238d1.pdf]

**Supporting Information**  
**for**  
**Multilevel/hierarchical nanocomposite imprinted regenerated**  
**cellulose membranes for high-efficiency separation: A selective**  
**recognition method with Au/PDA-loaded surface**

Ming Yan,<sup>1,&</sup> Yilin Wu,<sup>1,2,\*,&</sup> Rongxin Lin,<sup>1</sup> Faguang Ma,<sup>1</sup> Zhongyi Jiang<sup>2</sup>

<sup>1</sup>Institute of Green Chemistry and Chemical Technology, Advanced Chemical  
Engineering Laboratory of Green Materials and Energy of Jiangsu Province, School  
of Chemistry and Chemical Engineering, Jiangsu University, Zhenjiang 212013,  
China

<sup>2</sup>School of Chemical Engineering and Technology, Tianjin University, Tianjin  
300072, P. R. China

&Ming Yan and Yilin Wu contributed equally to this work and should be considered  
co-first authors

Corresponding Author\*

E-mail: wuyilin@ujs.edu.cn

## **Experimental Details**

The ATR-FTIR spectra ( $4000\text{--}500\text{ cm}^{-1}$ ) for modified ACMs were recorded on a FT-IR Nicolet560 apparatus (Nicol, U.S.A.), and ZnSe was used as the crystal plate. X-ray photoelectron spectroscopy (XPS) was performed to investigate the surface chemical composition of various synthesized membranes. The pressure in the analysis chamber was maintained at  $5.0 \times 10^{-8}$  torr or lower during each measurement. The membrane surface roughness was investigated by AFM (Solver P47 Atomic Force Microscopy, Russia) using tapping mode in the range of scanning area of  $4\mu\text{m} \times 4\mu\text{m}$  at room temperature in air.

## **Detailed test conditions of HPLC**

High performance liquid chromatography (HPLC) (Agilent 1200 series, U.S.A.) was used for the determination of propranolol, atenolol, bisoprolol and celiprolol. The condition of determination was as follows: methanol/ $0.02\text{ mmol/L KH}_2\text{PO}_4$  (50/50, v/v) mobile phase,  $0.9\text{ mL/min}$  flow rate,  $290\text{ nm}$  UV detection and  $25\text{ }^\circ\text{C}$  column temperature.

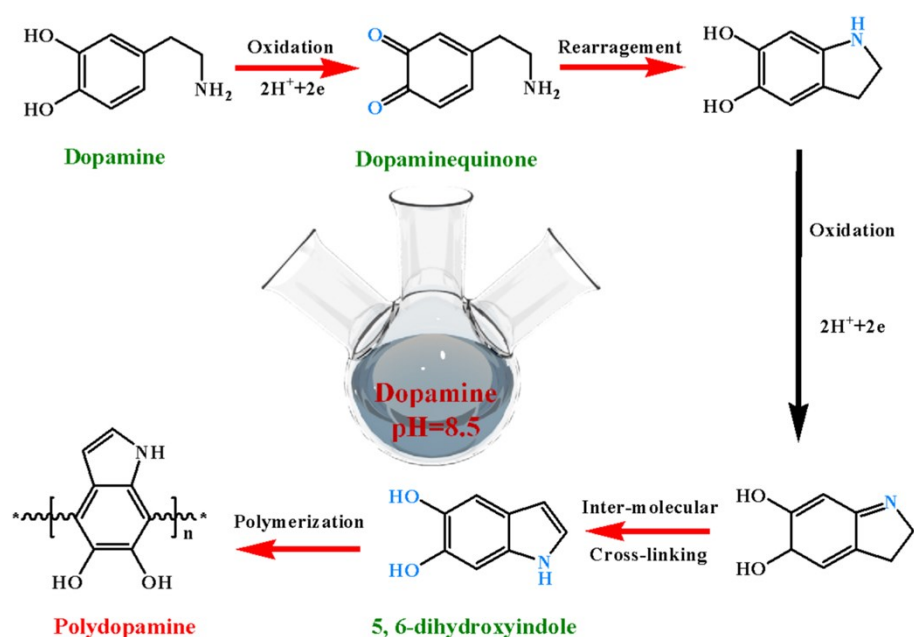

**Figure S1.** Possible reaction mechanism for dopamine polymerization

Dopamine could polymerize and stick on all kinds of organic and inorganic surfaces through the formation of strong covalent and noncovalent bonds with surfaces. The polymerization mechanism of dopamine was proposed as interaction of a noncovalent self-assembly and a covalent polymerization through oxidation of catechol to dopaminequinone under an aerobic and alkaline condition and then further oxidizes and polymerizes through deprotonation and intermolecular Michael addition reaction to form a cross-linked homopolymer. The functional groups such as catechol, amine, and imine can serve as both the starting points for covalent modification with desired molecules and the anchors for the loading of transition metal ions, which can further realize the emergence of diverse hybrid materials by virtue of its powerful reducing capability toward these metal ions under basic conditions.

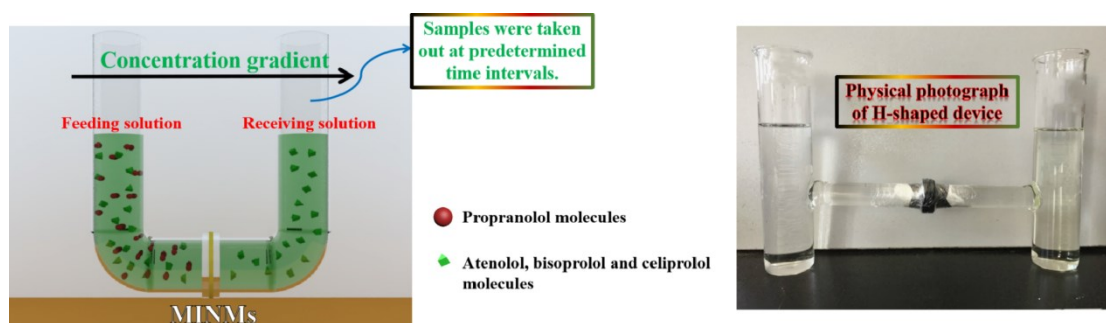

**Figure S2.** The H-shaped device of permeation experiments.

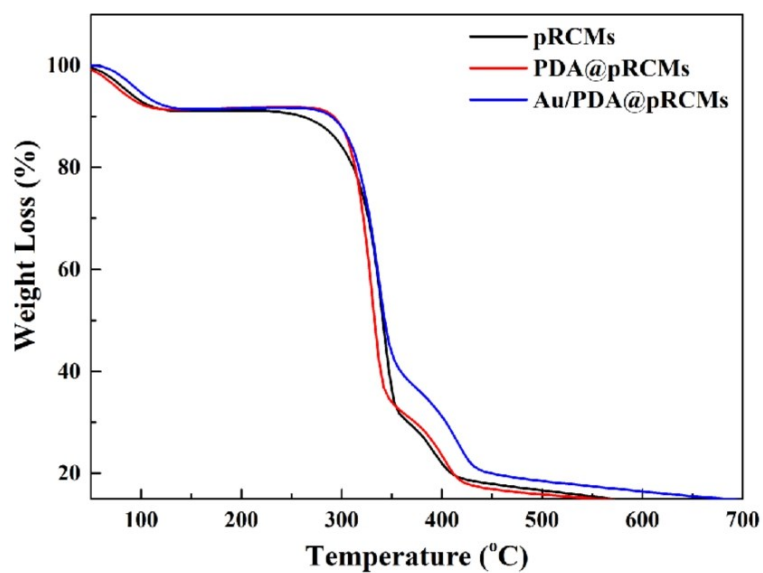

**Figure S3.** TGA results of pRCMs, PDA@pRCMs and Au/PDA@pRCMs.

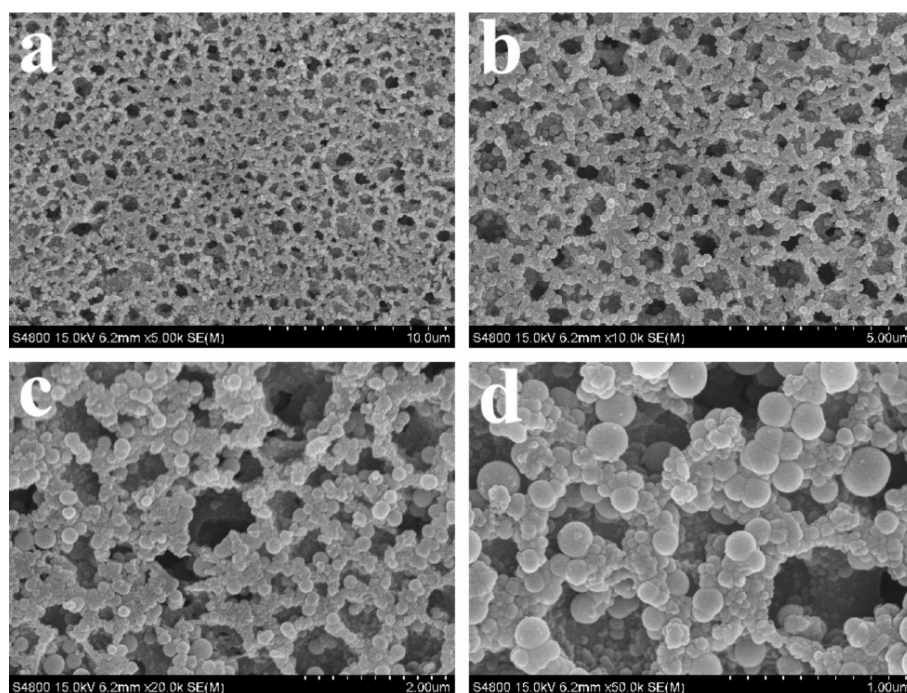

**Figure S4.** SEM results of MINMs synthesized by imprinting time of 36 h.

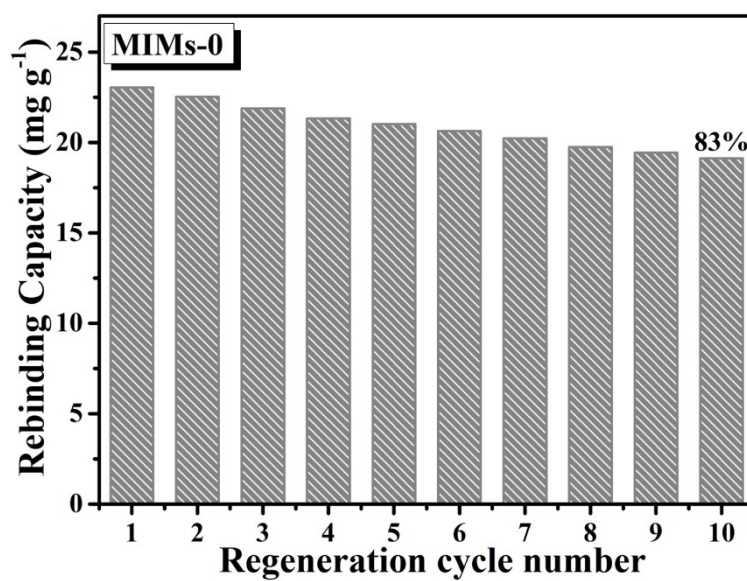

**Figure S5.** Regeneration performance of MIMs-0

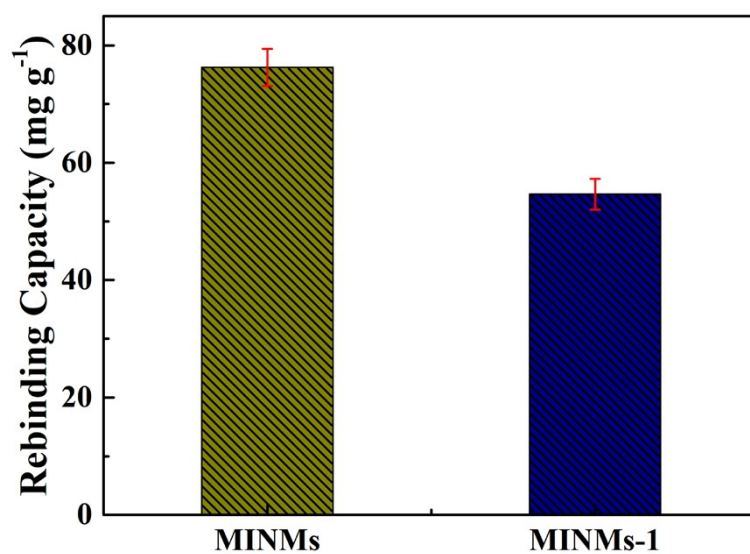

**Figure S6.** Rebinding capacities of MINMs and MINMs-1.

**Table S1.** Comparison of the rebinding capacities between MINMs and other adsorption materials

| Materials | Target molecules/ions | $Q$ (mg g <sup>-1</sup> ) | Ref       |
|-----------|-----------------------|---------------------------|-----------|
| CBMIMs    | enoxacin              | 32.10                     | S1        |
| PMIMs     | bisphenol A           | 46.65                     | S2        |
| NBMIMs    | artemisinin           | 66.90                     | S3        |
| P-AGNMs   | propranolol           | 54.90                     | S4        |
| GT-MIMs   | propranolol           | 53.44                     | S5        |
| MINMs     | propranolol           | 76.87                     | This work |

## Reference

- [1] J. Gao, S. Zhou, Z.Q. Hou, et al. Sep. Purif. Technol. 218 (2019) 59-69.
- [2] J. Lu, Y.Y. Qin, Y.L. Wu, et al. J. Membr. Sc. 601 (2020) 117917.
- [3] Y.L. Wu, W.D. Xing, M.J. Meng, et al. Compos. Part B-Eng. 198 (2020) 108123.
- [4] Y.L. Wu, R.X. Lin, F.G. Ma, et al. Sep. Purif. Technol. 250 (2020) 117176.
- [5] Y.L. Wu, C.X. Li, M.J. Meng, et al. Sep. Purif. Technol. 212 (2019) 245-254.
